# Supplementary material
Source: publisher figshare collection journal article supplement (https://tandf.figshare.com/articles/dataset/_/7946621)
Supplement: Supplementary file 1 [file 1]

# Orthogonal blocking arrangements for 24-run and 28-run two-level designs: supplementary tables.

December 5, 2016

## **Abstract**

In this document, we characterize the best orthogonally blocked 24-run and 28-run designs according to three criteria in terms of their  $F_3$ ,  $F_4$  and  $FA_3$  vectors and the rank of their interaction model matrix.

Table 1: Optimal blocking of 24-run designs in three blocks. Elements of the  $FA_3$  vector correspond to length-3 word counts of  $2/3$ ,  $1/2$  and  $1/6$ .

| ID   | $F_3(16, 8)$ |     | $F_4(24, 16, 8)$ |    |     | $FA_3$ |    |    | Rank | Optimality        |
|------|--------------|-----|------------------|----|-----|--------|----|----|------|-------------------|
| 4.1  | 0            | 0   | 0                | 0  | 1   | 0      | 0  | 0  | 11   | $W_2, W_3$        |
| 4.2  | 0            | 0   | 1                | 0  | 0   | 0      | 6  | 0  | 8    | $W_2^-$           |
| 5.1  | 0            | 0   | 0                | 0  | 5   | 0      | 0  | 2  | 16   | $W_2, W_3$        |
| 5.2  | 0            | 0   | 0                | 0  | 5   | 1      | 2  | 6  | 16   | $W_2^-$           |
| 6.1  | 0            | 2   | 0                | 0  | 9   | 0      | 0  | 4  | 22   | $W_2$             |
| 6.2  | 0            | 0   | 0                | 0  | 15  | 3      | 0  | 12 | 18   | $W_2^-$           |
| 6.3  | 0            | 0   | 0                | 0  | 15  | 0      | 0  | 6  | 18   | $W_3$             |
| 7.1  | 0            | 4   | 0                | 0  | 21  | 0      | 0  | 8  | 24   | $W_2$             |
| 7.2  | 0            | 0   | 0                | 0  | 35  | 2      | 3  | 11 | 19   | $W_2^-$           |
| 7.3  | 0            | 0   | 0                | 0  | 35  | 0      | 0  | 10 | 19   | $W_3$             |
| 8.1  | 0            | 7   | 0                | 0  | 53  | 0      | 0  | 13 | 24   | $W_2$             |
| 8.2  | 0            | 0   | 0                | 0  | 70  | 2      | 4  | 16 | 20   | $W_2^-$           |
| 8.3  | 0            | 0   | 0                | 0  | 70  | 0      | 0  | 14 | 20   | $W_3$             |
| 9.1  | 0            | 10  | 0                | 0  | 98  | 0      | 0  | 18 | 24   | $W_2$             |
| 9.2  | 0            | 0   | 0                | 0  | 126 | 0      | 9  | 18 | 21   | $W_2^-$           |
| 9.3  | 0            | 0   | 0                | 0  | 126 | 0      | 0  | 18 | 21   | $W_3$             |
| 10.1 | 0            | 14  | 0                | 0  | 168 | 1      | 2  | 24 | 24   | $W_2$             |
| 10.2 | 0            | 0   | 0                | 0  | 210 | 2      | 4  | 32 | 22   | $W_2^-$           |
| 10.3 | 0            | 0   | 0                | 0  | 210 | 0      | 3  | 24 | 22   | $W_3$             |
| 11.1 | 0            | 18  | 0                | 0  | 270 | 1      | 3  | 29 | 24   | $W_2$             |
| 11.2 | 0            | 0   | 0                | 0  | 330 | 3      | 5  | 33 | 23   | $W_2^-$           |
| 11.3 | 0            | 0   | 0                | 0  | 330 | 0      | 10 | 30 | 23   | $W_3$             |
| 12.1 | 0            | 0   | 0                | 0  | 495 | 0      | 12 | 36 | 24   | $W_2, W_2^-, W_3$ |
| 13.1 | 6            | 30  | 0                | 0  | 495 | 3      | 6  | 42 | 24   | $W_2, W_2^-$      |
| 13.2 | 0            | 90  | 1                | 0  | 366 | 0      | 3  | 51 | 24   | $W_3$             |
| 14.1 | 4            | 92  | 1                | 0  | 540 | 1      | 4  | 56 | 24   | $W_2$             |
| 14.2 | 4            | 92  | 1                | 0  | 540 | 4      | 4  | 48 | 24   | $W_2^-$           |
| 14.3 | 0            | 136 | 3                | 10 | 402 | 0      | 0  | 61 | 24   | $W_3$             |
| 15.1 | 3            | 151 | 3                | 0  | 630 | 0      | 6  | 54 | 24   | $W_2$             |
| 15.2 | 3            | 151 | 3                | 0  | 630 | 1      | 3  | 63 | 24   | $W_2^-$           |
| 15.3 | 0            | 181 | 3                | 4  | 578 | 0      | 1  | 63 | 24   | $W_3$             |
| 16.1 | 4            | 204 | 6                | 0  | 766 | 1      | 2  | 70 | 24   | $W_2, W_2^-$      |
| 16.2 | 3            | 216 | 3                | 14 | 721 | 0      | 0  | 76 | 24   | $W_3$             |

Table 2: Optimal blocking of 24-run designs in four blocks. Elements of the  $FA_3$  vector correspond to length-3 word counts of 1, 5/9, 1/3 and 1/9.

| ID   | $F_3(8)$ | $F_4(24, 16, 8)$ |    |      | $FA_3$ |    |    |     | Rank | Optimality        |
|------|----------|------------------|----|------|--------|----|----|-----|------|-------------------|
| 4.1  | 0        | 0                | 0  | 1    | 0      | 0  | 0  | 6   | 11   | $W_2, W_3$        |
| 4.2  | 0        | 1                | 0  | 0    | 6      | 0  | 0  | 0   | 8    | $W_2^-$           |
| 5.1  | 0        | 0                | 0  | 5    | 0      | 0  | 0  | 10  | 16   | $W_2, W_3$        |
| 5.2  | 0        | 0                | 0  | 5    | 3      | 0  | 1  | 6   | 16   | $W_2^-$           |
| 6.1  | 2        | 0                | 0  | 9    | 0      | 0  | 0  | 15  | 22   | $W_2$             |
| 6.2  | 0        | 0                | 0  | 15   | 1      | 5  | 2  | 7   | 18   | $W_2^-$           |
| 6.3  | 0        | 0                | 0  | 15   | 0      | 0  | 0  | 15  | 18   | $W_3$             |
| 7.1  | 4        | 0                | 0  | 21   | 0      | 0  | 2  | 19  | 24   | $W_2$             |
| 7.2  | 0        | 0                | 0  | 35   | 0      | 6  | 9  | 6   | 19   | $W_2^-$           |
| 7.3  | 0        | 0                | 0  | 35   | 0      | 0  | 0  | 21  | 19   | $W_3$             |
| 8.1  | 7        | 0                | 0  | 53   | 0      | 1  | 0  | 27  | 24   | $W_2$             |
| 8.2  | 0        | 0                | 0  | 70   | 0      | 8  | 12 | 8   | 20   | $W_2^-$           |
| 8.3  | 0        | 0                | 0  | 70   | 0      | 0  | 0  | 28  | 20   | $W_3$             |
| 9.1  | 10       | 0                | 0  | 98   | 0      | 0  | 2  | 34  | 24   | $W_2$             |
| 9.2  | 0        | 0                | 0  | 126  | 0      | 0  | 36 | 0   | 21   | $W_2^-$           |
| 9.3  | 0        | 0                | 0  | 126  | 0      | 0  | 0  | 36  | 21   | $W_3$             |
| 10.1 | 14       | 0                | 0  | 168  | 1      | 0  | 14 | 30  | 24   | $W_2$             |
| 10.2 | 0        | 0                | 0  | 210  | 0      | 0  | 36 | 9   | 22   | $W_2^-$           |
| 10.3 | 0        | 0                | 0  | 210  | 0      | 0  | 0  | 45  | 22   | $W_3$             |
| 11.1 | 18       | 0                | 0  | 270  | 1      | 0  | 18 | 36  | 24   | $W_2$             |
| 11.2 | 0        | 0                | 0  | 330  | 3      | 0  | 28 | 24  | 23   | $W_2^-$           |
| 11.3 | 0        | 0                | 0  | 330  | 0      | 10 | 20 | 25  | 23   | $W_3$             |
| 12.1 | 0        | 0                | 0  | 495  | 0      | 18 | 12 | 36  | 24   | $W_2, W_2^-, W_3$ |
| 13.1 | 98       | 1                | 4  | 342  | 0      | 8  | 8  | 62  | 24   | $W_2, W_2^-, W_3$ |
| 14.1 | 136      | 2                | 12 | 403  | 0      | 4  | 16 | 71  | 24   | $W_2, W_2^-, W_3$ |
| 15.1 | 180      | 2                | 21 | 507  | 1      | 7  | 8  | 89  | 24   | $W_2$             |
| 15.2 | 180      | 5                | 12 | 516  | 2      | 5  | 9  | 89  | 24   | $W_2^-$           |
| 15.3 | 180      | 2                | 23 | 499  | 0      | 9  | 8  | 88  | 24   | $W_3$             |
| 16.1 | 224      | 4                | 32 | 648  | 0      | 8  | 16 | 96  | 24   | $W_2, W_2^-$      |
| 16.2 | 224      | 12               | 16 | 640  | 0      | 0  | 32 | 88  | 24   | $W_3$             |
| 17.1 | 280      | 2                | 83 | 686  | 0      | 16 | 0  | 120 | 24   | $W_2, W_2^-$      |
| 17.2 | 280      | 12               | 16 | 864  | 0      | 0  | 32 | 104 | 24   | $W_3$             |
| 18.1 | 336      | 9                | 81 | 927  | 0      | 9  | 18 | 126 | 24   | $W_2, W_2^-, W_3$ |
| 19.1 | 408      | 4                | 38 | 1480 | 0      | 11 | 14 | 146 | 24   | $W_2, W_2^-$      |
| 19.2 | 408      | 9                | 81 | 1263 | 0      | 9  | 18 | 144 | 24   | $W_3$             |
| 20.1 | 480      | 5                | 48 | 1848 | 0      | 12 | 16 | 162 | 24   | $W_2, W_2^-, W_3$ |

Table 3: Optimal blocking of 24-run designs in six blocks. Elements of the  $FA_3$  vector correspond to length-3 word counts of 1, 2/3, and 1/3.

| ID   | $F_3(16, 8)$ |    | $F_4(24, 8)$ |     | $FA_3$ |    |    | Rank | Optimality        |
|------|--------------|----|--------------|-----|--------|----|----|------|-------------------|
| 4.1  | 0            | 0  | 0            | 1   | 0      | 0  | 4  | 11   | $W_2, W_3$        |
| 4.2  | 0            | 0  | 0            | 1   | 2      | 4  | 0  | 11   | $W_2^-$           |
| 5.1  | 0            | 0  | 0            | 5   | 0      | 1  | 6  | 16   | $W_2, W_3$        |
| 5.2  | 0            | 0  | 0            | 5   | 0      | 10 | 0  | 16   | $W_2^-$           |
| 6.1  | 0            | 2  | 0            | 9   | 0      | 2  | 8  | 22   | $W_2$             |
| 6.2  | 0            | 0  | 0            | 15  | 0      | 15 | 0  | 18   | $W_2^-$           |
| 6.3  | 0            | 0  | 0            | 15  | 0      | 2  | 8  | 17   | $W_3$             |
| 7.1  | 0            | 4  | 0            | 21  | 0      | 4  | 14 | 24   | $W_2$             |
| 7.2  | 0            | 0  | 0            | 35  | 0      | 15 | 5  | 19   | $W_2^-$           |
| 7.3  | 0            | 0  | 0            | 35  | 0      | 6  | 15 | 19   | $W_3$             |
| 8.1  | 0            | 7  | 0            | 53  | 1      | 5  | 19 | 24   | $W_2$             |
| 8.2  | 0            | 0  | 0            | 70  | 4      | 8  | 16 | 20   | $W_2^-$           |
| 8.3  | 0            | 0  | 0            | 70  | 0      | 8  | 20 | 20   | $W_3$             |
| 9.1  | 0            | 10 | 0            | 98  | 0      | 9  | 24 | 24   | $W_2$             |
| 9.2  | 0            | 0  | 0            | 126 | 1      | 14 | 21 | 21   | $W_2^-$           |
| 9.3  | 0            | 0  | 0            | 126 | 0      | 12 | 24 | 21   | $W_3$             |
| 10.1 | 0            | 14 | 0            | 168 | 0      | 12 | 30 | 24   | $W_2$             |
| 10.2 | 0            | 0  | 0            | 210 | 1      | 16 | 28 | 22   | $W_2^-$           |
| 10.3 | 0            | 0  | 0            | 210 | 0      | 16 | 28 | 22   | $W_3$             |
| 11.1 | 0            | 18 | 0            | 270 | 1      | 16 | 34 | 24   | $W_2$             |
| 11.2 | 0            | 0  | 0            | 330 | 2      | 20 | 29 | 23   | $W_2^-$           |
| 11.3 | 0            | 0  | 0            | 330 | 0      | 25 | 25 | 23   | $W_3$             |
| 12.1 | 0            | 0  | 0            | 495 | 0      | 30 | 30 | 24   | $W_2, W_2^-, W_3$ |
| 13.1 | 6            | 30 | 0            | 495 | 2      | 24 | 36 | 24   | $W_2, W_2^-$      |
| 13.2 | 0            | 90 | 1            | 366 | 2      | 12 | 48 | 24   | $W_3$             |
| 14.1 | 4            | 92 | 1            | 540 | 3      | 16 | 52 | 24   | $W_2, W_2^-, W_3$ |

Table 4: Optimal blocking of 28-run designs in seven blocks. Elements of the  $FA_3$  vector correspond to length-3 word counts of 6/7, 4/7 and 2/7.

| ID   | $F_3(12, 4)$ |     | $F_4(20, 12, 4)$ |    |     | $FA_3$ |    |    | Rank | Optimality             |
|------|--------------|-----|------------------|----|-----|--------|----|----|------|------------------------|
| 4.1  | 0            | 4   | 0                | 0  | 1   | 0      | 0  | 4  | 11   | $W_1, W_2, W_3$        |
| 4.2  | 0            | 4   | 0                | 1  | 0   | 2      | 4  | 0  | 11   | $W_2^-$                |
| 5.1  | 0            | 10  | 0                | 0  | 5   | 0      | 0  | 7  | 16   | $W_1, W_2, W_3$        |
| 5.2  | 0            | 10  | 0                | 2  | 3   | 1      | 6  | 3  | 16   | $W_2^-$                |
| 6.1  | 0            | 20  | 0                | 0  | 15  | 0      | 1  | 10 | 22   | $W_1, W_2$             |
| 6.2  | 0            | 20  | 1                | 4  | 10  | 3      | 4  | 8  | 20   | $W_2^-$                |
| 6.3  | 0            | 20  | 0                | 0  | 15  | 0      | 0  | 12 | 22   | $W_3$                  |
| 7.1  | 0            | 35  | 0                | 2  | 33  | 0      | 5  | 12 | 28   | $W_1$                  |
| 7.2  | 0            | 35  | 0                | 4  | 31  | 0      | 3  | 13 | 28   | $W_2$                  |
| 7.3  | 0            | 35  | 3                | 0  | 32  | 3      | 6  | 12 | 26   | $W_2^-$                |
| 7.4  | 0            | 35  | 1                | 2  | 32  | 0      | 1  | 17 | 28   | $W_3$                  |
| 8.1  | 0            | 56  | 0                | 10 | 60  | 0      | 8  | 15 | 28   | $W_1$                  |
| 8.2  | 0            | 56  | 2                | 8  | 60  | 0      | 4  | 20 | 28   | $W_2, W_3$             |
| 8.3  | 0            | 56  | 6                | 0  | 64  | 4      | 8  | 16 | 27   | $W_2^-$                |
| 9.1  | 0            | 84  | 0                | 25 | 101 | 0      | 10 | 22 | 28   | $W_1, W_2$             |
| 9.2  | 0            | 84  | 6                | 8  | 112 | 0      | 12 | 20 | 28   | $W_2^-$                |
| 9.3  | 0            | 84  | 0                | 36 | 90  | 0      | 6  | 30 | 26   | $W_3$                  |
| 10.1 | 0            | 120 | 10               | 16 | 184 | 0      | 8  | 37 | 28   | $W_1, W_2, W_2^-, W_3$ |
| 11.1 | 5            | 160 | 10               | 32 | 288 | 0      | 10 | 45 | 28   | $W_1, W_2, W_2^-, W_3$ |
| 12.1 | 10           | 210 | 15               | 48 | 432 | 0      | 12 | 54 | 28   | $W_1, W_2, W_2^-, W_3$ |
